# Supplementary material for: Formulation, Characterization, and Evaluation of Eudragit-Coated Saxagliptin Nanoparticles Using 3 Factorial Design Modules
Source: MDPI journal article supplement (doi:10.3390/molecules27217510), 2022-11-03
Supplement: s1 [file s1]

**SUPPLEMENTARY DATA:**

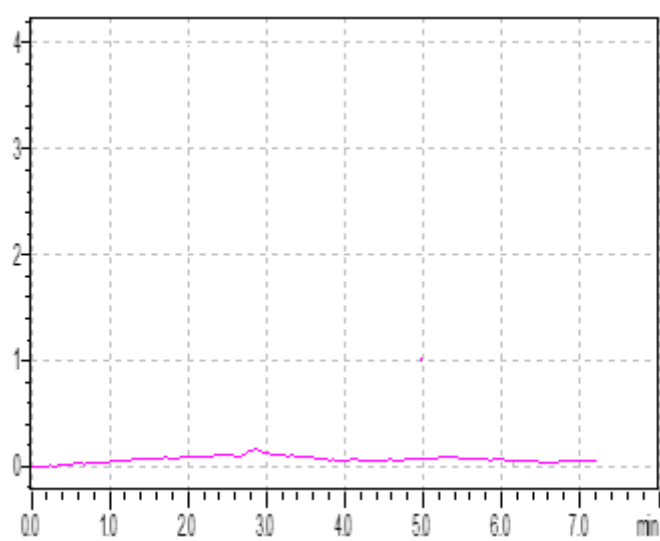

**Figure S1:** RP-HPLC chromatogram for blank run.

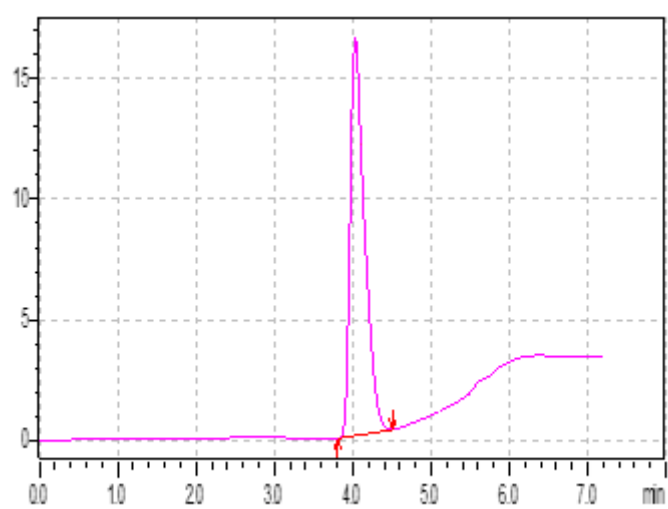

**Figure S2:** RP-HPLC chromatogram for analyte containing Saxagliptin.
